# Supplementary material
Source: HighWire-hosted journal article supplement (https://ajnr-sso.highwirestaging.com/highwire/filestream/106823/field_highwire_adjunct_files/0/0083.pdf)
Supplement: 0083.pdf [file 0083.pdf]

t2Dpcs ICaC4 L

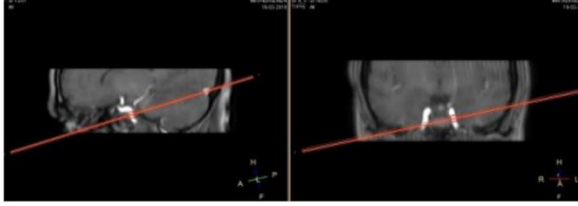

t2Dpcs ICaC4 R

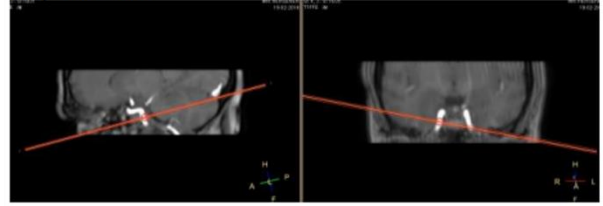

s2Dpcs MCA L

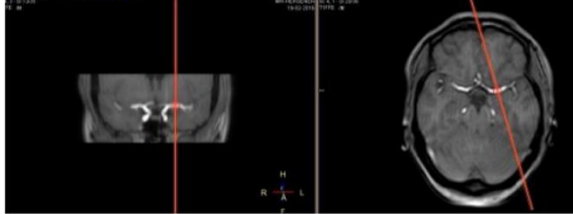

s2Dpcs MCA R

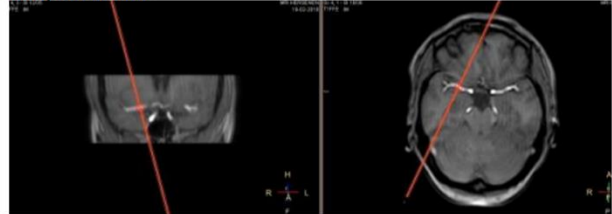

**Supplemental figure 1: illustration of the position of the 2Dphase-contrast (2D PC)scans.** The 2D PC was planned proximal and distal to the carotid siphon at C4 and origin of MCA
